# Supplementary material for: Health Communication through Positive and Solidarity Messages Amid the COVID-19 Pandemic: Automated Content Analysis of Facebook Uses
Source: Int J Environ Res Public Health. 2022 May 19;19(10):6159. doi: 10.3390/ijerph19106159 (PMC9141526; doi:10.3390/ijerph19106159)
Supplement: Supplementary file 1 [file ijerph-19-06159-s001.zip]

Archive with 4 entries (4 files):
- File S1. Examples of positive themes in Facebook posts with English translation.pdf
- File S2.pdf
- File S3. Message themes across crisis stages of the pandemic, pairwise comparison..pdf
- File S4. Public engagement across different crisis stages, pairwise comparison..pdf
