# Supplementary material for: Health Communication through Positive and Solidarity Messages Amid the COVID-19 Pandemic: Automated Content Analysis of Facebook Uses
Source: Int J Environ Res Public Health. 2022 May 19;19(10):6159. doi: 10.3390/ijerph19106159 (PMC9141526; doi:10.3390/ijerph19106159)
Supplement: Supplementary file 1 [file ijerph-19-06159-s001.zip › File S1. Examples of positive themes in Facebook posts with English translation.pdf]

**File S1.** Examples of positive themes in Facebook posts with English translation.

| Theme         | Definition                                                                                            | Example                                                                                                                                                                                                                                        |
|---------------|-------------------------------------------------------------------------------------------------------|------------------------------------------------------------------------------------------------------------------------------------------------------------------------------------------------------------------------------------------------|
| Solidarity    | Statement that advocates joint actions to contain the spread of the COVID-19                          | <p>“讓我們一起響應特區政府呼籲，<b>團結</b>抗疫，給予仍在前線奮戰的“家人”最實在的支持！”</p> <p>“Let us respond to the appeal of the SAR government, <b>unite</b> in the fight against COVID-19, and give support to our "families" who are still fighting on the front lines.”</p> |
| Anti-epidemic | Appeals to or motivate the public to fight against the COVID-19                                       | <p>“蓮城一心，無分你我，攜手<b>抗擊</b>疫情。”</p> <p>“Unite <b>against the COVID-19.</b>”</p>                                                                                                                                                                  |
| Gratitude     | Statement that expresses gratitude and regards to those who have made contributions during the crisis | <p>“<b>感恩</b>身處澳門這一福地，亦感激各位前線工作人員的奉獻”</p> <p>“I am grateful to be here in Macao, and we <b>thank</b> the medical staff at the frontline for their effort devoted to combat the virus.”</p>                                                     |
| Hope          | Statement that highlights the expectation or desire for good things to happen during the crisis       | <p>“<b>希望</b>疫情盡快過去，一切逐步回復正常吧！”</p> <p>“I <b>hope</b> the epidemic will be over as soon as possible and everything will gradually return to normal.”</p>                                                                                       |
| Optimism      | Statement that provides positive thought and lift spirit of the public                                | <p>“在大時代中我們疫境同行！澳門人<b>加油</b>！”</p> <p>“We are going together in the tough times! Macao people <b>come on! Add oil!</b>”</p>                                                                                                                    |
| Grit          | Mentions of perseverance to overcome difficulties                                                     | <p>“面對逆境，正是對全民的<b>磨練</b>，只要反躬自省，一定能夠找到解決的辦法。”</p> <p>“<b>Difficult circumstances can temper one's will.</b> As long as we reflect on ourselves, we will be able to find a solution.”</p>                                                       |

Note: One message may have more than one concept.

**Source links of examples:**

1. Solidarity:

<https://www.facebook.com/watch/?v=207990160599628>

2. Anti-epidemic:

<https://www.facebook.com/202772700178214/posts/857260701396074>

3. Gratitude:

<https://www.facebook.com/785937731445796/posts/3179939028712309>

4. Hope:

<https://www.facebook.com/349183078934/posts/10157906505723935>

5. Optimism:

<https://www.facebook.com/groups/1445500605709812/permalink/2683878415205352>

6. Grit:

<https://www.facebook.com/248547612010253/posts/1248802308651440>
