# Supplementary material for: Health Communication through Positive and Solidarity Messages Amid the COVID-19 Pandemic: Automated Content Analysis of Facebook Uses
Source: Int J Environ Res Public Health. 2022 May 19;19(10):6159. doi: 10.3390/ijerph19106159 (PMC9141526; doi:10.3390/ijerph19106159)
Supplement: Supplementary file 1 [file ijerph-19-06159-s001.zip › File S2.pdf]

## **File S2a. Keywords used in the study with English translation.**

### **1. Target words of COVID-19**

"武漢不明原因肺炎 (Wuhan unknown pneumonia)" OR "新冠肺炎疫情 (the Coronavirus outbreak)" OR "武漢肺炎 (Wuhan pneumonia)" OR "新型冠狀病毒 (Novel Coronavirus)" OR "疫情 (pandemic)" OR "新冠疫情 (COVID-19 pandemic)" OR "抗疫 (anti-epidemic)" OR "防疫 (anti-epidemic)" OR "新冠病毒 (Novel Coronavirus)" OR "武漢病毒 (Wuhan virus)" OR "中國病毒 (Chinese virus)" OR "功夫流感 (Kung Flu)" OR "中國肺炎 (China pneumonia)" OR "中國人肺炎 (Chinese pneumonia)" OR "COVID-19" OR "novel coronavirus" OR "2019-ncov" OR "NCP" OR "Novel Corona Pneumonia" OR "Chinese virus" OR "SARS-CoV-2" OR "pandemic" OR "epidemic" OR "Wuhan virus" OR "Wuhan pneumonia" OR "China pneumonia" OR "Chinese pneumonia"

### **2. Keywords for machine coding**

#### **(a) 團結 Solidarity**

"團結 (solidarity)" OR "齊心協力 (make concerted effort)" OR "守望相助 (helping and supporting each other)" OR "同舟共濟 (the spirit of partnership)" OR "團結一心 (unite as one)" OR "相互支持 (mutual support)" OR "團結一致 (unite as one)" OR "團結互助 (work in unity and help one another)" OR "共同 (together)" OR "攜手 (hand in hand)" OR "同心協力 (unite in a concerted effort)" OR "攜手並肩 (Hand in hand side by side)" OR "凝聚 (hold together)" OR "並肩 (side by side)" OR "上下一心 (all unite as one)" OR "萬眾一心 (work with one heart)" OR "團結合作 (unite and cooperate)" OR "風雨同舟 (meet challenges together)" OR "眾志成城 (work as one)" OR "同心 (with one heart)" OR "患難與共 (face difficulties together)" OR "齊心合力 (make concerted efforts)" OR "攜手同心 (together we stand)" OR "心連心 (hearts closely linked together)" OR "共同努力 (concerted effort)" OR "通力合作 (pull together)" OR "共同合作 (mutual cooperation)" OR "風雨同路 (stand together)" OR "共渡難關 (get over it)" OR "齊心 (stay in one mind)" OR "齊頭並進 (go hand in hand)" OR "團結抗疫 (fight epidemic with solidarity)" OR "一起抗疫 (fight epidemic together)" OR "協作 (collaborate)" OR "合力 (joint effort)"

#### **(b) 抗疫 Anti-epidemic**

"抗疫 (anti-epidemic)" OR "抗擊 (resist)" OR "戰疫 (fight the epidemic)" OR "抗緊疫 (anti-epidemic)" OR "抗疫長城 (a barrier against the epidemic)" OR "防疫長城 (a barrier for epidemic prevention)" OR "全民抗疫 (all the population together fight the epidemic)" OR "全城抗疫 (all the citizens together fight the epidemic)" OR "長期抗疫 (long term resistance to the epidemic)" OR "抗疫有你 (your involvement in the anti-epidemic career)"

#### **(c) 希望 Hope**

"希望 (hope)" OR "期望 (expect)" OR "冀望 (look forward to)" OR "期待 (expect)" OR "期盼 (anticipate)" OR "寄望 (place hope on)" OR "願 (wish)"

#### **(d) 感謝 Gratitude**

"感謝 (thanks)" OR "衷心感謝 (sincerely thank)" OR "非常感謝 (thank you so much)" OR "特別感謝 (special thanks)" OR "感激 (appreciate)" OR "多謝 (many thanks)" OR "表示感謝 (express gratitude)" OR "謝謝 (thank you)" OR "全賴 (owing to)" OR "無私奉獻 (selfless dedication)" OR "致謝 (express thanks)" OR "謝意 (thankfulness)" OR "報答 (pay back)" OR "貢獻 (contribution)" OR "答謝 (thank)" OR "作出貢獻 (make contribution)"

**(e) 樂觀 Optimism**

“加油 (keep it up)” OR “打氣 (encouragement)” OR “加油打氣 (go ahead)” OR “百毒不侵 (immune to diseases)” OR “鼓勁 (motivate)” OR “龍精虎猛 (vigorous)” OR “打打氣 (keep it up)”

**(f) 勇敢 Grit**

“勇敢 (courageous)” OR “奮鬥 (strive)” OR “堅韌 (tenacity)” OR “堅毅 (fortitude)” OR “逆境 (adversity)” OR “迎難而上 (overcome adversities)” OR “克服困難 (overcome difficulties)” OR “不畏艱險 (not afraid of the danger)” OR “逆流而上 (counter current)”

**Note:** Text in parenthesis indicates the meaning of the keyword in English.

**File S2b.** Keywords identified through Word2vec word embedding with corresponding similarity scores.

| <i>Grit</i><br>勇敢                              | <i>Solidarity</i><br>團結                                    | <i>Anti-epidemic</i><br>抗疫                                 | <i>Gratitude</i><br>感謝                     | <i>Hope</i><br>希望                      | <i>Optimism</i><br>加油                      |
|------------------------------------------------|------------------------------------------------------------|------------------------------------------------------------|--------------------------------------------|----------------------------------------|--------------------------------------------|
| 奮鬥<br>(strive)<br>0.587913275                  | 齊心協力<br>(make concerted effort)<br>0.714468658             | 抗擊<br>(resist)<br>0.512936592                              | 衷心感謝<br>(sincerely thank)<br>0.72669673    | 期望<br>(expect)<br>0.914320052          | 打氣<br>(encouragement)<br>0.645306349       |
| 堅毅<br>(fortitude)<br>0.541404724               | 守望相助<br>(helping and supporting each other)<br>0.707226157 | 抗緊疫<br>(anti-epidemic)<br>0.507600188                      | 非常感謝<br>(thank you so much)<br>0.709448755 | 冀望<br>(look forward to)<br>0.682302296 | 加油打氣<br>(go ahead)<br>0.556103587          |
| 逆境<br>(adversity)<br>0.540107489               | 同舟共濟<br>(the spirit of partnership)<br>0.70074141          | 抗疫長城<br>(a barrier against the epidemic)<br>0.474552691    | 特別感謝<br>(special thanks)<br>0.704126       | 期待<br>(expect)<br>0.620945573          | 百毒不侵<br>(immune to diseases)<br>0.55442822 |
| 迎難而上<br>(overcome adversities)<br>0.539864779  | 團結一心<br>0.690964222<br>(unite as one)                      | 防疫長城<br>(a barrier for epidemic prevention)<br>0.469383568 | 感激<br>(appreciate)<br>0.702687144          | 期盼<br>(anticipate)<br>0.598697066      | 鼓勁<br>(motivate)<br>0.538893461            |
| 克服困難<br>(overcome difficulties)<br>0.489892602 | 相互支持<br>(mutual support)<br>0.682557344                    | 戰疫<br>(fight the epidemic)<br>0.468843609                  | 多謝<br>(many thanks)<br>0.588089824         | 寄望<br>(place hope on)<br>0.560148358   | 龍精虎猛<br>(vigorous)<br>0.53035444           |
| 不畏艱險<br>(not afraid of the                     | 團結一致<br>(unite as one)                                     |                                                            | 表示感謝<br>(express                           |                                        | 打打氣<br>(keep it up)                        |

|                                          |                                                                   |  |                                                 |  |             |
|------------------------------------------|-------------------------------------------------------------------|--|-------------------------------------------------|--|-------------|
| danger)<br>0.467252612                   | 0.661968589                                                       |  | gratitude)<br>0.578718543                       |  | 0.503768146 |
| 逆流而上<br>(counter current)<br>0.463056326 | 團結互助<br>(work in unity<br>and help one<br>another)<br>0.647435546 |  | 謝謝<br>(thank you)<br>0.56649065                 |  |             |
|                                          | 共同<br>(together)<br>0.639477849                                   |  | 全賴<br>(owing to)<br>0.543093503                 |  |             |
|                                          | 攜手<br>(hand in hand)<br>0.636185408                               |  | 無私奉獻<br>(selfless<br>dedication)<br>0.523185313 |  |             |
|                                          | 同心協力<br>(unite in a<br>concerted effort)<br>0.632137835           |  | 致謝<br>(express thanks)<br>0.519904971           |  |             |
|                                          | 攜手並肩<br>(hand in hand<br>side by side)<br>0.619895577             |  | 謝意<br>(thankfulness)<br>0.502565205             |  |             |
|                                          | 凝聚<br>(hold together)<br>0.617751837                              |  | 報答<br>(pay back)<br>0.489438593                 |  |             |
|                                          | 並肩<br>(side by side)<br>0.602886021                               |  | 貢獻<br>(contribution)<br>0.4877159               |  |             |
|                                          | 上下一心<br>(all unite as one)<br>0.596060634                         |  | 答謝<br>(thank)<br>0.487063736                    |  |             |
|                                          | 萬眾一心<br>(work with one<br>heart)<br>0.595138311                   |  | 作出貢獻<br>(make<br>contribution)<br>0.486494362   |  |             |
|                                          | 團結合作<br>(unite and<br>cooperate)<br>0.587534547                   |  |                                                 |  |             |
|                                          | 風雨同舟<br>(meet challenges<br>together)<br>0.583126426              |  |                                                 |  |             |
|                                          | 眾志成城                                                              |  |                                                 |  |             |

|  |                                                           |  |  |  |  |
|--|-----------------------------------------------------------|--|--|--|--|
|  | (work as one)<br>0.571036637                              |  |  |  |  |
|  | 同心<br>(with one heart)<br>0.542360067                     |  |  |  |  |
|  | 患難與共<br>(face difficulties<br>together)<br>0.529419303    |  |  |  |  |
|  | 齊心合力<br>(make concerted<br>efforts)<br>0.523750305        |  |  |  |  |
|  | 攜手同心<br>(together we<br>stand)<br>0.519810677             |  |  |  |  |
|  | 心連心<br>(hearts closely<br>linked together)<br>0.507393599 |  |  |  |  |
|  | 共同努力<br>(concerted<br>effort)<br>0.504318058              |  |  |  |  |
|  | 通力合作<br>(pull together)<br>0.500597477                    |  |  |  |  |
|  | 風雨同路<br>(meet challenges<br>together)<br>0.491230011      |  |  |  |  |
|  | 共渡難關<br>(get over it)<br>0.489358038                      |  |  |  |  |

**Note:** Terms in the table headers represent meanings of the six themes and were used as the test words in the Word2vec model, while those in the cells are corresponding synonyms with cosine similarity scores calculated. Text in parenthesis indicates the meaning of the keyword in English.
