# Supplementary material for: Health Communication through Positive and Solidarity Messages Amid the COVID-19 Pandemic: Automated Content Analysis of Facebook Uses
Source: Int J Environ Res Public Health. 2022 May 19;19(10):6159. doi: 10.3390/ijerph19106159 (PMC9141526; doi:10.3390/ijerph19106159)
Supplement: Supplementary file 1 [file ijerph-19-06159-s001.zip › File S3. Message themes across crisis stages of the pandemic, pairwise comparison..pdf]

**File S3.** Posting themes across crisis stages of the pandemic, pairwise comparison.

| Theme* Crisis Stage Crosstabulation |               |                    |                   |                   |                   |        |
|-------------------------------------|---------------|--------------------|-------------------|-------------------|-------------------|--------|
|                                     |               |                    | Crisis Stage      |                   |                   | Total  |
|                                     |               |                    | Acute stage       | Chronic stage     | Prodromal stage   |        |
| Theme                               | Anti-epidemic | Count              | 7779 <sub>a</sub> | 6429 <sub>b</sub> | 11 <sub>b</sub>   | 14219  |
|                                     |               | % within Attribute | 54.7%             | 45.2%             | 0.1%              | 100.0% |
|                                     | Gratitude     | Count              | 2399 <sub>a</sub> | 2781 <sub>b</sub> | 6 <sub>a, b</sub> | 5186   |
|                                     |               | % within Attribute | 46.3%             | 53.6%             | 0.1%              | 100.0% |
|                                     | Hope          | Count              | 2883 <sub>a</sub> | 4798 <sub>b</sub> | 17 <sub>b</sub>   | 7698   |
|                                     |               | % within Attribute | 37.5%             | 62.3%             | 0.2%              | 100.0% |
|                                     | Optimism      | Count              | 1035 <sub>a</sub> | 590 <sub>b</sub>  | 1 <sub>a, b</sub> | 1626   |
|                                     |               | % within Attribute | 63.7%             | 36.3%             | 0.1%              | 100.0% |
|                                     | Resilience    | Count              | 176 <sub>a</sub>  | 539 <sub>b</sub>  | 0 <sub>a, b</sub> | 715    |
|                                     |               | % within Attribute | 24.6%             | 75.4%             | 0.0%              | 100.0% |
|                                     | Solidarity    | Count              | 4870 <sub>a</sub> | 4430 <sub>b</sub> | 24 <sub>c</sub>   | 9324   |
|                                     |               | % within Attribute | 52.2%             | 47.5%             | 0.3%              | 100.0% |
|                                     | Total         | Count              | 19142             | 19567             | 59                | 38768  |
|                                     |               | % within Attribute | 49.4%             | 50.5%             | 0.2%              | 100.0% |

Each subscript letter denotes a subset of crisis stage categories whose column proportions do not differ significantly from each other at the 0.05 level if they are annotated with a similar subscript. Reversely, within each row, percentages that don't share a subscript are significantly different. Tests are adjusted for all pairwise comparisons using the Bonferroni correction.
