# Supplementary material for: Health Communication through Positive and Solidarity Messages Amid the COVID-19 Pandemic: Automated Content Analysis of Facebook Uses
Source: Int J Environ Res Public Health. 2022 May 19;19(10):6159. doi: 10.3390/ijerph19106159 (PMC9141526; doi:10.3390/ijerph19106159)
Supplement: Supplementary file 1 [file ijerph-19-06159-s001.zip › File S4. Public engagement across different crisis stages, pairwise comparison..pdf]

**File S4.** Public engagement across different crisis stages, pairwise comparison.

|                            | <b>Likes</b>          |                            |             |                  |
|----------------------------|-----------------------|----------------------------|-------------|------------------|
|                            | <b>Test statistic</b> | <b>Std. test statistic</b> | <b>Sig.</b> | <b>Adj. sig.</b> |
| <b>Prodromal - Acute</b>   | -2,676.386            | -2.490                     | 0.013       | 0.038            |
| <b>Prodromal - Chronic</b> | -543.086              | -0.505                     | 0.613       | 1.000            |
| <b>Acute - Chronic</b>     | 2,133.301             | 23.561                     | <0.001      | <.001            |
